# Supplementary material for: Potential contributions of nitrifiers and denitrifiers to nitrous oxide sources and sinks in China's estuarine and coastal areas
Source: Copernicus journal article supplement (doi:10.5194/bg-19-3757-2022), 2022-08-18
Supplement: Supplementary file 2 [file bg-19-3757-2022-supplement.zip]

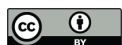

## *Supplement of*

# **Potential contributions of nitrifiers and denitrifiers to nitrous oxide sources and sinks in China's estuarine and coastal areas**

**Xiaofeng Dai et al.**

*Correspondence to:* Yao Zhang (yaozhang@xmu.edu.cn)

- bg-19-3757-2022-supplement-title-page.pdf
- sup
  - .DS\_Store
  - Table S1.xlsx
  - Table S3.xlsx
  - Table S4.xlsx
  - Table S5.xlsx
  - sup.pdf

The copyright of individual parts of the supplement might differ from the article licence.
