# Supplementary material for: Potential contributions of nitrifiers and denitrifiers to nitrous oxide sources and sinks in China's estuarine and coastal areas
Source: Copernicus journal article supplement (doi:10.5194/bg-19-3757-2022), 2022-08-18
Supplement: Supplementary file 2 [file Table S3.xlsx]

## Sheet: Table S3
Table S3. Gene abundance (average and median of triplicates; copies L-1) in the four estuaries. BS, Bohai Sea; YRE, Yangtze River Estuary; JRE, Jiulong River Estuary; PRE, Pearl River Estuary; AOA, ammonia-oxidizing archaea; AOB, ammonia-oxidizing bacteria; BD, bellow detection. S, surface layer; M, middle layer; B, bottom layer.
Station	AOA-S		AOA-M, M2		AOA-B		AOB-S		AOB-M, M2		AOB-B		nirS-S		nirS-M, M2		nirS-B		nirK-S		nirK-M, M2		nirK-B		nosZI-S		nosZI-M, M2		nosZI-B		nosZII-S		nosZII-M, M2		nosZII-B
	Average	Median	Average	Median	Average	Median	Average	Median	Average	Median	Average	Median	Average	Median	Average	Median	Average	Median	Average	Median	Average	Median	Average	Median	Average	Median	Average	Median	Average	Median	Average	Median	Average	Median	Average	Median
BS15	190870	189433	7.17295e+06	7.25572e+06	7.94648e+07	7.93637e+07	47219	39575.8	274658	230200	1.35746e+07	1.16363e+07	739002	739949	3.80764e+06	3.85991e+06	6.31356e+06	6.24693e+06	3.83869e+06	2.89287e+06	3.00694e+06	2.26687e+06	3.83771e+06	3.19799e+06	474406	494580	538405	537826	641862	647587	1.07193e+06	1.10752e+06	1.13962e+06	1.20181e+06	1.88079e+06	1.25324e+06
BS14	1.06737e+07	9.39951e+06	9.47278e+07	8.62723e+07	1.56644e+08	1.57716e+08	263055	230364	7.35606e+06	6.22735e+06	1.47179e+07	1.15539e+07	1.38297e+06	1.38297e+06	5.67033e+06	4.52918e+06	9.74614e+06	8.68648e+06	2.39326e+06	1.46232e+06	3.95573e+06	2.29302e+06	4.74219e+06	2.9415e+06	224061	224031	664485	671988	894270	901364	755715	748632	2.58768e+06	2.53805e+06	3.1675e+06	3.15434e+06
BS10	95285	100845	1.16918e+07	1.04102e+07	4.55073e+07	4.40744e+07	2914.68	2527.25	1.44779e+06	1.26677e+06	2.84344e+06	2.44985e+06	297577	297577	1.69684e+07	1.69684e+07	5.24938e+06	6.21204e+06	857124	463386	2.06417e+06	1.55557e+06	2.18626e+06	1.62197e+06	504765	490862	1.466e+06	1.45875e+06	1.2061e+06	1.20594e+06	227099	258284	2.4261e+06	2.44055e+06	1.76189e+06	1.73541e+06
BS6	1.97644e+08	1.8828e+08	1.35531e+08	1.24976e+08	2.94224e+08	2.69321e+08	1.48712e+06	1.16909e+06	1.79081e+06	1.49023e+06	4.88549e+06	4.0149e+06	3.1963e+06	6.44331e+06	3.32502e+06	6.71697e+06	1.4537e+07	2.88449e+07	3.41613e+06	5.85141e+06	4.10393e+06	3.06917e+06	7.15936e+06	5.50338e+06	656746	670507	967809	972250	3.05482e+06	3.06391e+06	552701	504158	615461	590837	1.28639e+06	1.29497e+06
BS2	1.06457e+08	1.07439e+08	3.57112e+08	3.53701e+08	2.99793e+08	2.94235e+08	3.32109e+06	2.72411e+06	4.65462e+06	4.6518e+06	8.98063e+06	7.52317e+06	6.42406e+06	6.35031e+06	1.29669e+07	1.29669e+07	1.56599e+07	1.62757e+07	2.11433e+06	1.59532e+06	1.47496e+06	1.10802e+06	1.89006e+06	1.39871e+06	1.19299e+06	4.49885e+06	3.07308e+06	3.12308e+06	2.88093e+06	2.82312e+06	782283	757570	1.0506e+06	1.05547e+06	814005	2.0215e+06
BS1	2.97022e+08	2.94929e+08			3.33525e+08	3.28739e+08	3.2654e+06	2.73547e+06			4.81771e+06	4.02306e+06	1.54677e+07	1.52726e+07			2.13559e+07	2.13746e+07	4.27451e+06	3.20289e+06			3.3486e+06	2.5501e+06	3.83899e+06	3.86058e+06			5.14294e+06	5.24118e+06	5.59664e+06	5.20694e+06			3.15731e+06	3.04003e+06
BS3	4.32064e+07	4.29128e+07	2.67674e+08	2.69687e+08	8.89068e+07	9.23801e+07	301134	252264	8.37393e+06	7.33655e+06	4.84694e+06	4.06034e+06	1.33197e+06	1.2898e+06	5.93716e+06	5.93716e+06	7.20662e+06	6.9232e+06	1.64162e+06	1.23695e+06	1.58825e+06	1.19673e+06	729229	554136	1.21665e+06	1.21104e+06	1.07427e+06	1.07427e+06	681320	697278	807430	776034	2.06682e+06	1.99995e+06	1.11434e+06	1.08218e+06
BS7	7.67814e+06	7.67814e+06	4.18472e+07	3.92372e+07	7.39934e+07	7.41384e+07	122168	102342	144439	120998	2.49235e+06	2.09897e+06	2.54001e+06	2.54287e+06	3.5277e+06	3.44928e+06	1.60791e+07	1.6063e+07	4.4259e+06	3.20343e+06	1.34779e+06	1.01554e+06	988199	678174	1.24654e+07	1.24751e+07	1.24767e+06	1.24767e+06	544932	545619	2.96745e+06	2.71542e+06	5.37761e+06	5.37671e+06	1.83079e+06	1.78389e+06
BS9	1.26782e+08	1.26782e+08	3.68229e+08	3.68197e+08	2.9142e+08	2.92774e+08	126438	105918	3.44863e+06	2.88082e+06	2.24891e+06	1.78753e+06	672000	219644	9.22837e+06	9.06083e+06	8.56922e+06	8.39066e+06	6.6854e+06	5.03739e+06	1.8685e+06	1.40789e+06	2.69679e+06	2.16035e+06	7.92216e+06	8.15595e+06	1.18816e+06	1.18001e+06	1.35056e+06	2.97774e+06	1.10848e+07	1.08884e+07	3.13823e+06	3.09554e+06	2.41254e+06	2.47489e+06
BS16	2.61394e+07	2.44823e+07	2.18738e+07	2.18738e+07	3.19432e+07	3.17087e+07	514879	402416	1.61856e+06	1.33463e+06	3.87524e+06	3.15474e+06	3.55586e+06	3.46574e+06	6.73647e+06	6.51561e+06	1.37435e+07	1.22056e+07	1.57521e+06	1.18981e+06	1.17424e+06	886045	1.44395e+06	1.08783e+06	2.15238e+06	214946	1.85791e+06	1.90414e+06	3.44289e+06	3.50747e+06	1.82701e+06	1.81929e+06	2.06351e+06	2.01285e+06	2.94021e+06	2.88927e+06
BS11	1.45199e+07	1.45105e+07	6.18807e+06	6.18597e+06	2.8635e+06	2.86474e+06	187181	156905	323810	271435	332867	279026	6.29168e+06	6.28314e+06	4.60212e+06	4.41217e+06	6.87915e+06	6.87915e+06	931648	733218	1.84583e+06	1.3906e+06	729663	550117	2.12639e+06	219450	1.16619e+06	1.14652e+06	604383	604302	1.98402e+06	2.13043e+06	2.37167e+06	2.10208e+06	2.22376e+06	2.32305e+06
BS8	1.84776e+06	1.84776e+06	4.79855e+07	4.79999e+07	4.41095e+07	4.42381e+07	164199	145748	1.8452e+06	1.54674e+06	2.73487e+06	2.31769e+06	2.89681e+06	2.89681e+06	6.4293e+06	6.25846e+06	6.7104e+06	8.86888e+06	584852	416542	1.01596e+06	770305	2.1101e+06	1.58969e+06	734075	554971	1.05299e+06	4.18668e+06	2.36148e+06	2.36111e+06	1.06065e+06	1.01735e+06	1.71605e+06	1.62552e+06	1.81091e+06	1.72382e+06
BS4	709430	684587	7.62119e+07	7.74013e+07	7.55739e+07	7.53597e+07	33898.2	28415.2	884976	741833	3.10622e+06	2.32309e+06	726738	726738	1.15729e+07	1.15729e+07	1.75246e+07	1.77325e+07	352682	281123	2.26591e+06	1.70707e+06	55147.6	41586	380544	380493	1.0944e+07	1.09336e+07	1.54043e+06	1.5856e+06	1.93285e+06	1.84633e+06	1.11878e+07	1.20178e+07	9.29166e+06	9.22281e+06
BS5	1.77506e+07	1.87268e+07	1.90091e+07	1.91372e+07	6.18386e+07	6.11603e+07	59600.4	49960.2	412983	466834	1.73542e+06	1.45367e+06	1.60118e+06	1.60118e+06	3.39256e+06	3.39256e+06	7.97982e+06	1.0345e+07	1.13091e+06	852119	447782	337395	2.92887e+06	2.20176e+06	643978	672531	992352	1.02247e+06	1.15326e+06	1.15031e+06	6.1349e+06	6.21141e+06	3.95831e+06	3.5919e+06	4.19757e+06	4.21835e+06
BS13	545176	569744	4.25155e+06	4.42011e+06	1.96708e+06	2.02601e+06	18460.6	15463.5	65112.1	54541	416453	318061	220969	234138	1.36632e+06	1.37394e+06	1.56415e+06	1.56384e+06	112352	84655.3	255964	200132	110463	83231.8	114196	114196	337724	337774	90523	91042.9	428094	418240	1.00945e+06	1.03664e+06	937983	970299
BS18	5.66475e+06	5.66475e+06	4.72712e+06	4.58038e+06	2.22573e+06	2.24469e+06	11267.4	9438.09	2.39084e+06	2.00268e+06	72269.7	60536.6	127800	127743	84994.6	98311.5	412842	405543	298627	225010	21898.9	16500.4	157110	116158	417927	417927	85969	86842.8	177183	177183	510123	513095	145644	129795	173530	177811
BS12	4.13441e+07	4.57311e+07	8.38262e+07	8.36194e+07	5.64241e+07	5.63283e+07	1.98998e+06	1.82284e+06	3.77853e+06	3.2326e+06	3.2116e+06	2.66652e+06	2.18796e+06	2.0936e+06	4.51014e+06	6.73761e+06	7.28006e+06	7.66333e+06	2.72619e+07	2.02651e+07	2.30022e+06	1.733e+06	3.81088e+06	2.88922e+06	1.09399e+06	574676	2.03118e+06	2.08841e+06	1.28011e+06	1.30248e+06	2.24369e+07	2.07282e+07	1.55659e+06	1.47069e+06	1.53854e+06	1.62028e+06
BS17	8.76697e+06	9.74808e+06	6.09758e+07	6.33991e+07	8.02686e+07	7.92071e+07	544938	456466	4.40941e+06	3.49043e+06	6.14547e+06	5.95135e+06	597746	1.31242e+06	4.77309e+06	4.77309e+06	7.75475e+06	7.72103e+06	1.14917e+06	865745	2.16914e+06	1.63711e+06	2.80339e+06	2.03402e+06	512134	499882	1.25006e+06	1.23362e+06	1.12482e+06	1.15987e+06	537325	544185	1.11126e+06	1.11928e+06	722447	729198
BS19	1.28289e+06	1.28289e+06			4.31956e+06	4.31956e+06							116381	114962			1.48071e+06	1.4247e+06	124360	90647.7			208028	156669	61888.1	63767.4			99880.1	89227.1	28678.1	30549.9			128644	130314
BS20	103608	103608	26555.6	26555.6	28458	28458							23741.3	23129.6	51506.5	47876.7	45516.6	45567.7	22705.2	17136.2	16539.8	11988.4	13088.9	9857.46	7582.34	7927.05	25619.7	25991.4	7384.99	7172.96	6546.97	6896.06	9165.99	9544.93	7183.59	7150.78
YRE3	2.03147e+07	2.03266e+07	9.94159e+06	9.94159e+06			1.4573e+07	1.47103e+07	2.29701e+07	2.29701e+07			2.02311e+06	1.96354e+06	8.60493e+06	8.90329e+06			147230	141310	123568	145087			44830.2	45402.3	210495	210495			1.91547e+06	1.88266e+06	2.79215e+06	2.68804e+06
YRE6	166478	166478	1.62016e+07	1.583e+07	2.91634e+07	2.88291e+07	32074.8	32960	BD	BD	8.33653e+06	8.33653e+06	164978	143435	217555	215577	3.22758e+06	2.90269e+06	26831.3	29682.6	80359.4	83856.4	68651.3	59619.4	4702.71	4611.08	11661.7	11661.7	119908	120083	718835	637880	2.106e+06	2.09509e+06	1.63988e+06	1.59818e+06
YRE1	720725	720725					1.17023e+07	1.22771e+07					1.86206e+07	1.90033e+07					200344	203259					141806	141806	BD	BD			3.32599e+06	3.39109e+06
YRE2	81780.6	77767.2	1.30928e+07	1.29353e+07			1.72517e+06	1.72517e+06	5.0992e+07	5.0992e+07			612336	592043	3.56191e+07	3.65146e+07			108067	110834	256330	254794			21947.6	22622.3	421997	404859			788720	791011	8.11093e+06	8.0186e+06
YRE4	4.50954e+06	4.50646e+06	4.75845e+06	4.75845e+06	3.78953e+07	3.79018e+07	1.6604e+06	1.6604e+06	5.27933e+06	5.27933e+06	1.86981e+07	1.86981e+07	2.17103e+06	2.05004e+06	621165	612677	8.39628e+06	8.34357e+06	2.69867e+06	2.03334e+06	891021	1.00066e+06	38933	29344.2	154427	153238	19686.3	19405.4	172594	183270	6.7403e+06	6.37061e+06	810172	809377	2.23609e+06	2.07553e+06
YRE7	4860.85	4860.85	242537	242942	378388	376109	53730.9	59434.4	41231.9	41231.9	58041.5	58041.5	14266.2	13830.6	18259.5	19191.3	31038.3	30986.1	710.502	544.042	765.708	581.836	957.163	743.367	432.711	408.415	890.461	890.545	1582.96	1582.96	47607.9	53179.4	13197.2	12768.8	14918	14306.8
YRE5	32445.9	32499.4	1.47507e+06	1.50977e+06			BD	BD	310931	309459	BD	BD	13367.1	12623.6	122935	121181			6211.3	4818.48	3205.73	1574.05			1961.46	1961.46	11383.1	11383.1			59936.8	71926.6	78294.2	73106.1
YRE8	1.94481e+06	1.94481e+06	2.52E+04, 2.10E+05	2.53E+04, 2.07E+05	6.9714e+06	6.9714e+06	90864.9	90864.9	BD, BD	BD, BD	1.05644e+06	1.05644e+06	151977	150219	BD, 2.71E+04	BD, 2.83E+04	440243	444878	47427.6	37977.6	1.24E+03, 5.50E+03	935.301	19083.5	14383.4	3220.65	3137.98	4.50E+02, BD	4.13E+02, BD	35166.1	34774.8	872330	946795	6.14E+03, 8.11E+04	8.82E+03, 7.83E+04	283501	293408
YRE10	50773.2	50773.2	1.86781e+06	1.80783e+06	5420000	5.44673e+06	BD	BD	109886	109886	897196	897196	29298	29623.9	17425.4	15859.7	194373	194373	10773	8119.75	2764.96	2080.63	11012.1	8143.3	1798.87	1798.87	2329.63	2329.63	14717.8	14458.5	156102	155370	43297.6	42123.8	209826	211136
YRE11	8.57198e+06	8.57198e+06	3.45226e+06	3.45226e+06			3.18122e+06	3.17753e+06	2.94668e+06	2.94668e+06			1.12877e+06	1.12877e+06	1.13156e+06	1.13156e+06			940650	708996	34070.9	25673.4			23684.5	23667.5	40816.2	40782.5			8.096e+06	7.15188e+06	729317	752635
YRE9	3.25882e+06	3.29633e+06	8.66859e+07	8.67556e+07			BD	BD	2.305e+07	2.305e+07			283496	283496	1.39157e+07	1.39157e+07			46322.7	34905.5	267858	207197			11469.4	11469.4	532342	531477			779456	784104	7.06742e+06	6.93934e+06
YRE12	1.84438e+06	1.84444e+06	3.67633e+07	3.67633e+07			4741.89	4771.79	90193.8	90193.8			744828	719481	1.87648e+07	1.72467e+07			59677.5	44968.7	234997	177077			53586.2	53342.4	493373	493373			1.93073e+06	1.96151e+06	7.9121e+06	7.36887e+06
YRE13	9.46656e+07	1.30211e+07	2.43E+05, 8.99E+04	2.47E+05, 8.99E+04	3.67999e+06	3.69129e+06	BD		BD, BD	BD, BD	1537.74	1537.92	245762	264281	4.28E+04, 2.90E+04	4.28E+04, 2.90E+04	170874	170874	63593.6	47680.7	1.25E+04, 6.56E+03	9440.3	9512.97	7168.29	3153.19	3153.19	6.42E+03, BD	6.42E+03, BD	10727.5	10727.5	334907	354483	3.59E+05, 2.18E+05	3.78E+05,2.30E+05	142198	144743
YRE16	377324	386412	4.06105e+06	4.06105e+06	1.53343e+07	1.5394e+07	BD		153.441	40602.7	1274.11	1044.06	158667	158667	236993	236993	351129	372669	39587.8	29830.5					4314.81	4561.25	18623	18623	26872.5	26872.5	1.02654e+06	1.04322e+06	1.58862e+06	1.49001e+06	6.03096e+06	5.94933e+06
YRE15	2.54783e+06	2.39159e+06	6.89874e+07	6.89874e+07			BD		BD	BD			148591	148591	2.09137e+06	2.09137e+06			44702.6	44702.6	187632	187632			12188.6	12623.9	89143.6	89143.6			572606	520865	1.74766e+06	1.71082e+06
YRE14	7.00472e+06	7.00472e+06	1.0826e+07	1.0826e+07			812.261	1400.22	5177.88	5184.71			397275	397275	1.36753e+06	1.36753e+06									8727.92	7784.75	38287.8	38287.8			357334	347869	972345	1.04204e+06
JRE1	682165	655079					580954	571070					2.6271e+07	2.65913e+07					482615	482547					232356	220130					BD	BD
JRE2	1.15564e+06	468388					408389	322153					6.28637e+06	5.88563e+06					89950.5	90468.6					44336.4	43537.9					BD	BD
JRE3	767750	767750					67970.3	75401.5					702691	713124					40479.2	40574.2					7145.68	6900.6					BD	BD
JRE4	4.40019e+06	4.40019e+06					258400	248911					2.60047e+06	2.58182e+06					48406.9	48691.4					38368.5	38679.5					BD	BD
JRE5	916972	734972					167212	169257					3.77743e+06	3.7102e+06					122119	120987					55086.2	57010.6					BD	BD
JRE6	528370	511665					60513.8	60150.4					380374	368524					10798.6	10640.4					16729.7	16670.4					BD	BD
JRE7	749401	749401					16321.8	17867.7					257177	254667					4592.44	4592.44					25769.4	25890.7					BD	BD
PRE1	3.138e+06	3.07118e+06			6.87595e+06	6.87595e+06	39386.9	35133			14928.2	19182.1	1.66348e+09	1.66508e+09			1.17355e+09	1.53529e+09	9.70397e+06	9.55908e+06			8.30146e+06	8.35161e+06	2.28732e+06	2.30659e+06			2.11696e+06	1.51323e+06	BD	BD			BD	BD
PRE2	445666	333400			54380.2	54380.2	46327	41884.4			16555.9	13990.2	1.98643e+08	1.98643e+08			4.79274e+07	4.45368e+07	693985	693985			433254	447260	717402	715201			385578	183582	2.72998e+06	2.45698e+06			1.62474e+06	1.5435e+06
PRE3	56446.5	56620.5			335710	335710	45811.5	40450.4			132312	131937	2.85732e+07	2.69221e+07			4.37653e+07	4.37653e+07	76487.7	76697.7			437084	436739	95866	101730			117326	115488	820732	738659			1.73831e+06	1.65139e+06
PRE4	461415	450276			94279.1	94428.7	31850.9	29600.7			9083.13	9240.9	3.65409e+07	3.37377e+07			1.06061e+06	2.05045e+06	341808	368662			48956.8	48352	148923	145870			31419.9	31160.1	2.00492e+06	1.80443e+06			4.05931e+06	3.85634e+06
PRE5	4.21791e+06	4.24267e+06			2.86665e+06	3.04409e+06	8212.63	9160.82			5780.99	6778.8	3.37463e+07	3.26517e+07			4.04694e+06	3.52646e+06	538623	530257			144132	143662	153760	157478			33688.3	33817.4	682202	613982			604123	573917
PRE6	1.78974e+06	1.75676e+06			1.25632e+07	1.29275e+07	2693.24	2234.28			69499.4	70075.3	8.24381e+06	8.5282e+06			2.64152e+07	2.84588e+07	99511.1	99934.1			294021	293938	38907.6	39220.5			20283.5	43658.7	312853	281567			94267.5	89554.1
PRE7	3.26521e+06	3.21333e+06			5.66327e+06	5.71976e+06	7805.13	7804.17			10296.7	10296.7	2.11981e+07	2.03642e+07			2.83703e+07	3.43324e+07	404748	399693			442370	442370	9935.35	10032			16430.4	11468.9	395025	355522			5.75627e+06	5.46845e+06
PRE8	3.09123e+06	2.96495e+06			2.43476e+06	2.46035e+06	5891.98	6469.18			3398.28	3132.99	1.84775e+07	1.78788e+07			1.69097e+07	2.18359e+07	308480	305357			274425	274425	9216.75	8248.99			8519.99	7051.34	7.71667e+06	6.945e+06			1.16727e+07	1.1089e+07
PRE9	780403	780403			269348	262450	2204.78	2114.15			1102.59	1102.59	34751.3	33469			85466.8	87054.9	2518.13	2529.51			1785.62	1772.07	750.101	720.401			6851.84	2819.24	4.31105e+06	3.87995e+06			99145.8	94188.5
PRE10	45912.2	46358.3			173357	173026	805.237	805.237			1107.71	1175.48	259391	252225			171756	166796	5671.87	5674.57			2430.63	2444.9	1440.82	1440.23			3066.01	2963.9	71747.2	64572.5			41966.2	39867.8
PRE11	7.39273e+06	7.42586e+06			7.14293e+06	7.06089e+06	4844.33	4746.38			7296.61	7197.28	2.12607e+06	2.10259e+06			1.89865e+06	1.81633e+06	31286.5	36966.8			91067.2	85104.5	21427.5	20771.8			24859.1	17411.1	2.63268e+06	2.36941e+06			1.05765e+07	1.00477e+07
