# Supplementary material for: Potential contributions of nitrifiers and denitrifiers to nitrous oxide sources and sinks in China's estuarine and coastal areas
Source: Copernicus journal article supplement (doi:10.5194/bg-19-3757-2022), 2022-08-18
Supplement: Supplementary file 3 [file bg-19-3757-2022-supplement.zip]

Archive with 8 entries (7 files):
- bg-19-3757-2022-supplement-title-page.pdf
- sup/
- sup/.DS_Store
- sup/sup.pdf
- sup/Table S1.xlsx
- sup/Table S5.xlsx
- sup/Table S4.xlsx
- sup/Table S3.xlsx
