# Supplementary material for: Potential contributions of nitrifiers and denitrifiers to nitrous oxide sources and sinks in China's estuarine and coastal areas
Source: Copernicus journal article supplement (doi:10.5194/bg-19-3757-2022), 2022-08-18
Supplement: Supplementary file 3 [file bg-19-3757-2022-supplement.zip › sup/Table S5.xlsx]

## Sheet: Table S5-1
Table S5-1 Data on N2O concentration collected from the literature. BS, Bohai Sea; YRE, Yangtze River Estuary; JRE, Jiulong River Estuary; PRE, Pearl River Estuary.
Estuary	Layer	Sample time	N2O concentration																								Reference
BS	surface	2008.8*	7.2	7.3	7.4	7.4	7.5	7.6	7.6	7.7	7.8	7.9	8	8.1													Song et al., 2015
BS	bottom		7.6	7.6	7.6	8	8.4	8.4	8.8	8.8	8.8	9.2	9.2	10
YRE	surface	2002.4	13.3223	14.3432	13.3979	12.1871	11.9775	18.9317	11.2979	13.091	11.4062	12.7254	12.1465	12.727	12.2537	12.0968	11.4104	11.2536	11.1491	10.8346	10.6221	10.4101	9.88386	8.83462	8.72717	8.14902	Zhang et al., 2010
YRE	bottom		12	11	11
YRE	surface	2002.11	9.01828	7.80866	8.49913	8.66081	14.5568	16.6655	9.40172	8.92814	8.98157	9.35138	9.03699	8.30015	8.09072	8.03938	8.19757	7.98844	8.35736	8.62111	7.77841	7.88407	8.095	7.83244	6.67475	6.56988
YRE	bottom		9	9	9
YRE	surface	2006.6	9.50659	9.19199	9.5623	10.143	8.82726	9.67035	9.56539	9.88148	9.67125	9.0924	8.30234	8.46132	7.98894	7.51625	10.4611	10.7268	10.2542	9.99002	9.35825	8.83163	8.83343	8.72816	7.83363	7.57107
YRE	bottom		9.5	10.5	10.5	11.5	12.5
YRE	surface	2006.8	9	9	9	12	12	15	18
YRE	bottom		8.5	8.5	8.5	10	10	11.5	13	13
YRE	surface	2006.1	8	8	9	9	10	10	10	11	11
YRE	bottom		9	11	11	13	13	13	13	15
YRE	surface	2012.3*	12	14	18	30																					Wang et al., 2014
YRE	bottom		10	12	14	20	30
YRE	surface	2012.7*	8	8	8	10	10	14	14	20	24
YRE	bottom		10	10	11	11	15	20	25
YRE	surface	2013.8*	7.5	7.5	8.5	8.5	8.5	8.5	8.5	9.5	11																Wang et al. 2016
YRE	bottom		8	9	9	9	11	11	12	15	19	23	25	27
JRE	surface	2009	83	59	51	35	27	21	14																		﻿Zhan et al., 2011
JRE	surface	2011.8	48.6917	61.9671	69.3438	73.7699	75.2386	79.1661	84.5651	73.7192	99.2625	85.434	87.3385	63.1773	14.7601	113.4											Wu et al., 2013
PRE		2003.9*	20.43	48.57	22.2	20	21.8	31.6	33.3	26.8	7.7	7.9	7.5	7.3	7.1	6.9	7.5	7.3	7.9	8.1	7.7						Chen et al., 2008
PRE		2007.4	169.892	148.165	232.362	128.249	141.842	202.449	158.883	157.281	135.493	196.109	211.287	211.4	241.729	142.65	161.354	117.788	87.7361								Lin et al., 2016
PRE		2008.8	223.672	285.969	104.634	92.9474	113.28	116.746	103.431	86.6939	69.9396	65.0193	65.0888	65.1843	66.9432	75.4332	52.1127	47.8699	44.6736
PRE		2010.5	183.459	331.685	289.912	140.448	128.849	90.4026	40.8347	40.9563	36.0273
PRE		2010.8	111.026	65.8227	82.9678	118.478	108.516	98.6147	93.7465	78.6989	45.5378	64.3636	62.8132
PRE		2010.11	92.2569	72.263	50.6666	47.4182	52.7294	37.8729	36.3399	34.8591	39.9705
PRE		2011.2	282.451	245.625	291.349	177.309	153.885	117.084	105.52	102.245	85.6994	57.2762	65.8966	50.9098	54.2711	34.7809	36.7829
PRE	surface	2015.7	141.99	48.07	116	146	106	102	95.0311	89.441	25.7143	23.4783	14.5342	12.2981	11.1801	11.1801											Ma et al., 2019
PRE	bottom	2015.7	148.696	97.2671	109.565	122.981	143.106	100.621	114.037	90.559	83.8509	20.1242	20.1242	8.9441	8.9441	5.59006	3.35404
PRE	surface	2005*	323.1		174.8		176.4		116.5		120		105.1		115.3		91.8		57.7								Xu et al., 2005
PRE	bottom		329.9		195.9		205.6		109.9		117.6		106.5		92.3		61.6
* indicates the original data from the literature, otherwise the data were obtained through GetData software.

## Sheet: Table S5-2
Table S5-2 Data on N2O flux collected from the literature. BS, Bohai Sea; YRE, Yangtze River Estuary; JRE, Jiulong River Estuary; PRE, Pearl River Estuary.
Estuary	Layer	Sample time		N2O flux																										Reference
BS	surface	2008.8	LM 86	0.360721	0.741483	0.661323	0.541082	0.571142	0.531062	0.671343	1.02204	0.931864	1.1022	0.741483	0.701403	0.771543	0.901804	0.671343	0.761523	0.971944	0.621242	1.33267	0.791583	0.390782	1.23246	0.390782	0.631263	0.771543	0.440882	Song et al., 2015
			W92	1.02204	1.96393	1.72345	1.46293	1.56313	1.34269	1.73347	2.69539	2.44489	2.87575	2.02405	1.84369	2.13427	2.33467	1.73347	2.00401	2.56513	1.63327	3.54709	2.10421	1.03206	3.23647	1.002	1.67335	2.06413	1.22244
YRE	surface	2003.9	LM 86	27.98	18.79	29.26	55.41	40.46	20.08	0.59	2.13	3.93	0.3	0.61																Zhang et al., 2008
			W92	47.8	31.2	46.22	97.48	62.72	32.24	2.19	4.93	7.82	0.75	2.11
JRE	surface	2009	LM 86	68.7	52.3	47	35	27	24	20																				﻿Zhan et al., 2011
			W92	99.7	72	63	43	34	27	23
PRE	surface	2015.7	W92	320.5	330.435	270.807	345.342	248.447	233.54	218.634	218.634	196.273	248.447	37.2671	47.205	106.832	9.93789	9.93789	14.9068	7.45342	12.4224	7.45342								Ma et al., 2019
LM86, the sea-to-air N2O flux was calculated using the transfer velocity of gas estimated by the relationship proposed by Liss and Merlivat (1986); W92, the sea-to-air N2O flux was calculated using the transfer velocity of gas estimated by the relationship proposed by Wanninkhof (1992).

## Sheet: Table S5-3
Table S5-3 Data on △N2O collected from the literature. BS, Bohai Sea; YRE, Yangtze River Estuary; JRE, Jiulong River Estuary; PRE, Pearl River Estuary.
Estuary	Layer	Sample time	△N2O																										Reference
YRE			3.5	4	4.5	5	5.5	6	6.5	7	7.5	8	8.5	9	9.5	10	1	12	12.5	11	15	2	1
JRE	surface	2010.7	23.24	15.82	21.2637	14.84	28.68	23.74	13.85	16.32																			Wu et al., 2013
JRE	bottom		14.34	19.78	31.15	22.75	18.3	9.9	9.4	4.95
JRE	surface	2011.2	53.41	37.58	22.75	18.3	12.36
JRE	surface	2011.4	68.42	42.74	47.37	29.73	19.2	22.75
JRE	surface	2011.8	65.52	72.59	77.64	79.71	74.72	77.29	85.94
PRE		2010.3	52.4333	68.0517	116.153	166.472	316.97	276.858	63.1597																				Lin et al., 2016
PRE		2008.8	89.1374	78.5942	94.8882	98.722	45.0479	85.3035	67.0927	50.7987	44.0895	43.131	47.9233	47.9233	55.5911	29.7125	28.754	23.9617	20.1278	16.2939	29.7125	24.9201	21.0863	18.2109	13.4185	13.4185	14.377	116.933
PRE		2007.4	114.058	217.572	121.725	185.942	198.403	139.936	138.978	176.358	197.444	198.403	225.24	121.725	140.895	97.7636	68.0511	31.6294	32.5879	31.6294	32.5879	13.4185	15.3355	18.2109	12.4601	12.4601
PRE		2011.1	25.0583	17.6607	23.9539	34.4554	42.7617	65.7822
PRE		2010.1	21.9656	17.7327	26.1334	39.7725	48.1598	68.1124	76.3917	79.4506	97.1968	131.904	153.89	231.793	270.56
PRE	bottom	2015.7	159	101	115	131	150	105	120	95	87	17	15	11	3	2													Ma et al., 2019
